# Supplementary material for: Überprüfung der Faktorenstruktur und Validierung des Fragebogens zum Studieninteresse am Thema schulische Inklusion (SIT-IN)
Source: Atypon-hosted journal article supplement (doi:10.1026/0012-1924/a000285), 2022-04-01
Supplement: 0012-1924_a000285_esm1.pdf [file 0012-1924_a000285_esm1.pdf]

ESM 1. Itemkennwerte sowie Faktorladungen der zwei- und der dreifaktoriellen EFA

|     |                                                                                                                                            | Itemkenn- |           | EFA Ladung  |             |             |             |             |
|-----|--------------------------------------------------------------------------------------------------------------------------------------------|-----------|-----------|-------------|-------------|-------------|-------------|-------------|
|     |                                                                                                                                            | werte     |           | 2 Faktoren  |             | 3 Faktoren  |             |             |
|     |                                                                                                                                            | <i>M</i>  | <i>SD</i> | 1           | 2           | 1           | 2           | 3           |
| 1P  | Die Beschäftigung mit inklusionsspezifischen Unterrichtsmethoden hat für mich eine geringe Bedeutung.*                                     | 4.86      | 1.22      | <b>.666</b> | .512        | <b>.662</b> | .488        | .400        |
| 2A  | Diskussionen über das Thema Inklusion machen mir schlechte Laune.*                                                                         | 4.84      | 1.37      | <b>.624</b> | .156        | <b>.628</b> | .120        | .219        |
| 3P  | Ich möchte in möglichst vielen Seminaren die Bedeutung der jeweiligen Inhalte für die Gestaltung eines inklusiven Unterrichts diskutieren. | 4.16      | 1.45      | <b>.781</b> | .607        | <b>.775</b> | .547        | .554        |
| 4I  | In meiner Freizeit einen Workshop zum Thema „Differenzierung und inklusiver Unterricht“ zu besuchen, kommt für mich nicht in Frage.*       | 4.40      | 1.51      | <b>.622</b> | .579        | <b>.615</b> | .509        | .550        |
| 5I  | Ich lese auch in meiner Freizeit Literatur zur Inklusion.                                                                                  | 2.45      | 1.42      | .355        | <b>.709</b> | .341        | <b>.649</b> | .588        |
| 6I  | Zur Auseinandersetzung mit dem Thema Inklusion, würde ich auch Seminare besuchen, in denen ich keine LPs erwerben kann.                    | 3.55      | 1.50      | .547        | <b>.686</b> | .539        | .543        | <b>.929</b> |
| 7P  | Ich habe Interesse daran, mich mit wissenschaftlichen Artikeln zum Thema schulische Inklusion auseinanderzusetzen.                         | 3.78      | 1.45      | .444        | <b>.691</b> | .429        | <b>.673</b> | .522        |
| 8A  | Wenn es Seminar das Thema Inklusion behandelt, freue ich mich besonders drauf.                                                             | 3.71      | 1.32      | <b>.825</b> | .569        | <b>.828</b> | .555        | .434        |
| 9P  | Bei der Wahl von Lehrveranstaltungen berücksichtige ich besonders Seminare zum Thema „Heterogenität und Inklusion“.                        | 3.02      | 1.33      | <b>.675</b> | .606        | <b>.670</b> | .586        | .460        |
| 10A | Die Beschäftigung mit Forschungsergebnissen zum Thema schulische Inklusion macht mir Spaß.                                                 | 3.60      | 1.31      | <b>.664</b> | .624        | <b>.660</b> | <b>.663</b> | .384        |
| 11I | Die Frage, wie inklusiver Unterricht gelingen kann, beschäftigt mich auch in meiner Freizeit.                                              | 3.75      | 1.53      | .384        | <b>.725</b> | .368        | <b>.728</b> | .471        |
| 12I | Wenn ein Seminar Begleitliteratur zum Thema „Inklusion“ bietet, bin ich besonders motiviert diese zu lesen.                                | 2.97      | 1.24      | .565        | <b>.783</b> | .551        | <b>.755</b> | .594        |
| 13A | Seminare zu "Unterrichtsmethoden für inklusiven Unterricht" habe ich keine Lust zu besuchen.*                                              | 4.78      | 1.35      | <b>.684</b> | .517        | <b>.677</b> | .485        | .448        |
| 14P | Mir ist es wichtig, Wissen zu theoretischen und empirischen Forschungsergebnissen schulischer Inklusion zu erhalten.                       | 3.99      | 1.45      | .235        | .411        | .219        | <b>.495</b> | .127        |

Anmerkungen:  $r_{ic}$  = Korrigierte Item-Skala-Korrelation;  $\alpha_{s-i}$  = Cronbachs Alpha, wenn Item weggelassen; \* = rekodierte Items. Die Buchstaben I, P und A in den Itembezeichnungen verweisen auf die drei Facetten (P)ersönliche und (A)ffektive Valenz sowie (I)ntersischer Charakter. Hellgrau unterlegte Items wurden im Laufe des Fittings eliminiert.
